# Supplementary material
Source: PubMed Central journal article supplement (PMC4651163)
Supplement: gf532sup_10-1055-s-0032-1315361.pdf [file gf532sup_10-1055-s-0032-1315361.pdf]

# Chemotherapieinduzierte Amenorrhö – ein Update

## Chemotherapy-Induced Amenorrhea – An Update

Autoren

C. Liedtke, L. Kiesel

Institut

Gynecology and Obstetrics, Klinik für Frauenheilkunde und Geburtshilfe, Universitätsklinikum Münster, Münster

**Tab. 1** Verschiedene Chemotherapeutika gruppiert nach dem Risiko für das Auftreten einer CIA (in Anlehnung an [22]).

|                         |                              |                                                                                                                                                                                                          |
|-------------------------|------------------------------|----------------------------------------------------------------------------------------------------------------------------------------------------------------------------------------------------------|
| <b>Hochrisiko</b>       | alkylierende Stoffe:         | <ul style="list-style-type: none"> <li>▶ Cyclophosphamid</li> <li>▶ Ifosfamid</li> <li>▶ Busulphan</li> <li>▶ Chlorambucil</li> <li>▶ Melphalan</li> <li>▶ Chlormethin</li> <li>▶ Procarbazin</li> </ul> |
| <b>mittleres Risiko</b> | Platin:                      | <ul style="list-style-type: none"> <li>▶ Cisplatin</li> <li>▶ Carboplatin</li> </ul>                                                                                                                     |
|                         | anthrazyklische Antibiotika: | <ul style="list-style-type: none"> <li>▶ Doxorubicin</li> </ul>                                                                                                                                          |
|                         | Taxoide:                     | <ul style="list-style-type: none"> <li>▶ Paclitaxel</li> <li>▶ Docetaxel</li> </ul>                                                                                                                      |
| <b>Niedrigrisiko</b>    | Vincaalkaloide:              | <ul style="list-style-type: none"> <li>▶ Vincristin</li> <li>▶ Vinblastin</li> </ul>                                                                                                                     |
|                         | anthrazyklische Antibiotika: | <ul style="list-style-type: none"> <li>▶ Bleomycin</li> </ul>                                                                                                                                            |
|                         | Antimetabolite:              | <ul style="list-style-type: none"> <li>▶ Methotrexat</li> <li>▶ 5-Fluorouracil</li> <li>▶ Mercaptopurin</li> </ul>                                                                                       |

**Tab. 2** Veränderungen als Ausdruck einer CIA.

|                                   |
|-----------------------------------|
| Änderungen im Menstruationszyklus |
| Ultraschallbefunde                |
| ▶ Antral Follicle Count (AFC)     |
| ▶ Ovarialvolumen (OV)             |
| Laborwertveränderungen            |
| ▶ Frühphasen-FSH ↑                |
| ▶ Östradiol (E2) ↓                |
| ▶ LH ↑                            |
| ▶ Inhibin B ↓                     |
| ▶ Anti-Müller-Hormon (AMH) ↓      |

**Tab. 3** Leitlinie der Arbeitsgemeinschaft Gynäkologische Onkologie zur Proktion der Ovarfunktion bei prämenopausalen Patientinnen unter adjuvanter Chemotherapie.

| Prophylaxe der ovariellen Funktion und Fertilitätserhaltung bei prämenopausalen Patientinnen mit adjuvanter Chemotherapie | Oxford/AGO |   |   |
|---------------------------------------------------------------------------------------------------------------------------|------------|---|---|
|                                                                                                                           | LoE/GR     |   |   |
| CT + GnRHa<br>(GnRHa-Applikation > 2 Wochen vor Chemotherapie)                                                            | 1b         | B | - |
| ▶ HR+                                                                                                                     | 1b         | B | - |
| ▶ HR-<br>(Beeinflussung des Chemoeffekts nicht ausgeschlossen!)                                                           | 1b         | B | - |
| ▶ Beratung über Fertilitätserhaltung                                                                                      | 4          | C | + |
| ▶ Fertilitätserhalt mit assist. reprod. Therapie                                                                          | 4          | C | + |

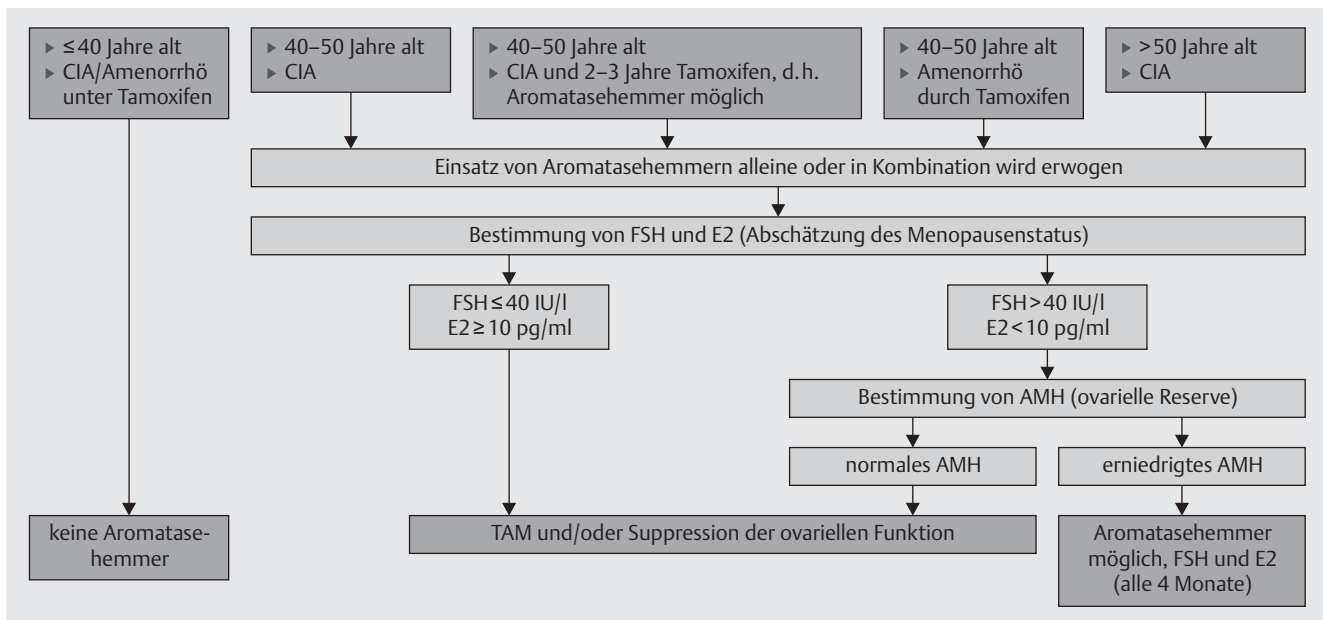

**Abb. 1** Praktisches Vorgehen bei Patientinnen mit hormonabhängigem Mammakarzinom, bei denen ein Wechsel von Tamoxifen auf Aromatasehemmer vorgesehen ist.

*Hinweis:* Der Beitrag wurde laut folgendem Erratum am 5.12.2012 geändert: Im Beitrag muss es in **Fig. 1** unterhalb des Kastens „Determination of FSH and E2/(estimation of menopausal status)“ im rechten Kasten korrekt heißen:  
 FSH > 40 IU/L  
 E2 < 10 pg/mL
